# Supplementary material
Source: MDPI journal article supplement (https://www.mdpi.com/2504-3129/1/1/7)
Supplement: s1 [file s1]

### Validation metrics:

The classification performance measures used in our study are listed below:

| Parameter                                        | Evaluation focus                                                                                                 | Definition                                                                                                  |
|--------------------------------------------------|------------------------------------------------------------------------------------------------------------------|-------------------------------------------------------------------------------------------------------------|
| Accuracy <sub>i</sub>                            | Effectiveness of a classifier for i-th class                                                                     | $\frac{TP_i + TN_i}{TP_i + TN_i + FN_i + FP_i}$                                                             |
| Sensitivity <sub>i</sub><br>/Recall <sub>i</sub> | Effectiveness of a classifier to identify positive labels for i-th class                                         | $\frac{TP_i}{TP_i + FN_i}$                                                                                  |
| Specificity <sub>i</sub>                         | Effectiveness of a classifier to identify negative labels for i-th class                                         | $\frac{TN_i}{TN_i + FP_i}$                                                                                  |
| Precision <sub>i</sub>                           | Class agreement of the data labels with the positive labels for i-th class                                       | $\frac{TP_i}{TP_i + FP_i}$                                                                                  |
| F1 – Score <sub>i</sub>                          | Relations between positive labels and those given by a classifier for i-th class                                 | $\frac{2 \times \text{Precision}_i \times \text{Sensitivity}_i}{\text{Precision}_i + \text{Sensitivity}_i}$ |
| Accuracy <sub>m</sub>                            | The average per-class effectiveness of a classifier                                                              | $\frac{\sum_{i=1}^l (\frac{TP_i + TN_i}{TP_i + FN_i + FP_i})}{l}$                                           |
| Sensitivity <sub>m</sub><br>/Recall <sub>m</sub> | Effectiveness of a classifier to identify class labels if calculated from sums of per-category decisions         | $\frac{\sum_{i=1}^l TP_i}{\sum_{i=1}^l (TP_i + FN_i)}$                                                      |
| Specificity <sub>m</sub>                         | The average per class effectiveness of a classifier to identify negative labels                                  | $\frac{\sum_{i=1}^l TN_i}{\sum_{i=1}^l (TN_i + FP_i)}$                                                      |
| Precision <sub>m</sub>                           | Agreement of the data class labels with those of a classifiers if calculated from sums of per-category decisions | $\frac{\sum_{i=1}^l TP_i}{\sum_{i=1}^l (TP_i + FP_i)}$                                                      |

---

|                         |                                                                                                             |                                                                                                                     |
|-------------------------|-------------------------------------------------------------------------------------------------------------|---------------------------------------------------------------------------------------------------------------------|
| F1 – Score <sub>m</sub> | Relations between data's positive labels<br>and those given by a classifier based on a<br>per-class average | $\frac{2 \times \mathbf{Precision}_m \times \mathbf{Sensitivity}_m}{\mathbf{Precision}_m + \mathbf{Sensitivity}_m}$ |
|-------------------------|-------------------------------------------------------------------------------------------------------------|---------------------------------------------------------------------------------------------------------------------|

---

l is the number of categories. True positive (TP<sub>i</sub>): Spectral data belong to the i-th category which is correctly identified; false positive (FP<sub>i</sub>): Spectral data which do not belong to the i-th category, incorrectly identified; true negative (TN<sub>i</sub>): Spectral data which do not belong to the i-th category, correctly identified; false negative (FN<sub>i</sub>): Spectral data belong to the i-th category, incorrectly identified.
